# Supplementary material for: A Comprehensive Review of Micro/Nano Precision Glass Molding Molds and Their Fabrication Methods
Source: MDPI journal article supplement (doi:10.3390/mi12070812), 2021-07-12
Supplement: s1 [file s1]

## [Supplementary Materials]

**Table S1:** Summary of studies on micro/nano glass molding using Si molds. **Acronyms:** CBG: carbon-bonded graphene; RIE: reactive ion etching; EBL: electron-beam lithography; MLA: microlens array; OLED: organic light-emitting diode; Si<sub>3</sub>N<sub>4</sub>: silicon nitride; KrF: krypton fluoride; N/A: not available.

| Authors & Affiliations                                    | Mold fabrication methods    | Pattern geometries on the mold                             | Glass materials                                                                           | Anti-adhesion coating materials  | Molding conditions                              | Molding methods    | Mold surface roughness (R <sub>a</sub> ) | Proposed/ tested applications |
|-----------------------------------------------------------|-----------------------------|------------------------------------------------------------|-------------------------------------------------------------------------------------------|----------------------------------|-------------------------------------------------|--------------------|------------------------------------------|-------------------------------|
| Saotome et al./Gunma University, Japan[36]                | EBL and anisotropic etching | V-grooves with throat widths ranging from 100 nm to 2.0 μm | K-PSK 100<br><i>T<sub>g</sub></i> : 390°C<br><br>K-PG 375<br><i>T<sub>g</sub></i> : 344°C | NA                               | Temperature: 357 °C<br>Pressure: 10 MPa         | Isothermal molding | 5 nm                                     | V-groove microstructure       |
| Li et al./Hong Kong Polytechnic University, Hong Kong[41] | Precision diamond machining | MLA<br>Size (period): 60 μm<br>Sag height: 900 nm          | P-SK75<br><i>T<sub>g</sub></i> : 493°C                                                    | CBG coating<br>Thickness: 130 nm | Temperature: 700°C<br>Pressure: Direct pressing | Active heating     | 2 nm                                     | Light manipulation            |

|                                                       |                                                                                   |                                                                                                                             |                           |                                                            |                                           |                    |        |                      |
|-------------------------------------------------------|-----------------------------------------------------------------------------------|-----------------------------------------------------------------------------------------------------------------------------|---------------------------|------------------------------------------------------------|-------------------------------------------|--------------------|--------|----------------------|
| Chen et al./Ohio State University, USA[42]            | Ultraprecision diamond turning and RIE                                            | Fresnel lens                                                                                                                | K-PG325<br>$T_g$ : 285°C  | CBG coating                                                | N/A                                       | Isothermal molding | 88 nm  | Optical applications |
| He et al./Ohio State University, USA[43]              | Photolithography and plasma-assisted RIE<br><br>Precision diamond turning and RIE | Microwells with a width of 11µm and a height of 1.5 µm<br><br>Fresnel lens with a diameter of 9 mm and a teeth depth of 1µm | P-LASF47<br>$T_g$ : 530°C | CBG coating<br>Thickness: 45 nm                            | Temperature: 640 °C<br>Pressure: 0.22 MPa | Active heating     | 0.5 nm | Image sensing        |
| Hung et al./National Tsing Hua University, Taiwan[44] | Dicing followed by traditional lithography and wet etching                        | Line and spacing patterns with a width of 20 µm and a depth of 20 µm, 40 µm, and 200 µm                                     | K-PG375<br>$T_g$ : 344°C  | Si <sub>3</sub> N <sub>4</sub> coating<br>Thickness: 50 nm | Temperature: 352°C<br>Pressure: 2.1 MPa   | Isothermal molding | N/A    | Optical applications |

|                                                         |                             |                                                                                                                              |                          |                                                     |                                                                                           |                                          |       |                      |
|---------------------------------------------------------|-----------------------------|------------------------------------------------------------------------------------------------------------------------------|--------------------------|-----------------------------------------------------|-------------------------------------------------------------------------------------------|------------------------------------------|-------|----------------------|
| He et al./Ohio State University, USA[45]                | Precision diamond turning   | Kinoform (Fresnel) lens<br><br>MLA dimensions: 360 $\mu\text{m}$ $\times$ 360 $\mu\text{m}$<br>Sag height: 4.6 $\mu\text{m}$ | P-SK57<br>$T_g$ : 493°C  | CBG coating                                         | Temperature: 560°C<br>Pressure: 20 kPa                                                    | Isothermal molding                       | 15 nm | Light manipulation   |
| Zawawi et al./Yonsei University, Korea, Republic of[46] | KrF lithography and RIE     | Nanograting structure with a width of 500 nm and a depth of 335 nm                                                           | K-PG375<br>$T_g$ : 344°C | $\text{Si}_3\text{N}_4$ coating<br>Thickness: 30 nm | Temperature: 370.9 °C<br>Pressure: 0.2 MPa<br><br>Temperature: 360°C<br>Pressure: 2.3 MPa | Active heating<br><br>Isothermal molding | 3 nm  | Optical applications |
| Ishihara et al./Kyoto University, Japan[47]             | EBL and plasma-assisted RIE | Nanograting pattern with a pitch of 300 nm, a diameter of 200 nm, and heights ranging from 40 nm to 60 nm                    | K-PG375<br>$T_g$ : 343°C | N/A                                                 | Temperature: 360°C<br>Pressure: 2.2 MPa                                                   | Isothermal molding                       | N/A   | OLED applications    |

|                                                           |                                |                                                              |                         |                                 |                                          |                |                    |                      |
|-----------------------------------------------------------|--------------------------------|--------------------------------------------------------------|-------------------------|---------------------------------|------------------------------------------|----------------|--------------------|----------------------|
| Li et al./Hong Kong Polytechnic University, Hong Kong[48] | Single-point diamond machining | MLA<br>Size (period): 60 $\mu\text{m}$<br>Sag height: 900 nm | P-SK75<br>$T_g$ : 493°C | CBG coating<br>Thickness: 60 nm | Temperature: 565°C<br>Pressure: 43.5 kPa | Active heating | 6.2 nm to 10.75 nm | Optical applications |
|-----------------------------------------------------------|--------------------------------|--------------------------------------------------------------|-------------------------|---------------------------------|------------------------------------------|----------------|--------------------|----------------------|

**Table S2:** Summary of studies on micro/nano glass molding with Ni-alloy molds. **Acronyms:** FIB: focused ion beam; DLC: diamond-like carbon; MLA: microlens array; N/A: not available.

| Authors & Affiliations                                | Mold fabrication methods                             | Pattern geometries on the mold                   | Glass materials                                   | Anti-adhesion coating materials | Molding conditions                                                                   | Molding methods    | Mold surface roughness (R <sub>a</sub> ) | Proposed/ tested applications |
|-------------------------------------------------------|------------------------------------------------------|--------------------------------------------------|---------------------------------------------------|---------------------------------|--------------------------------------------------------------------------------------|--------------------|------------------------------------------|-------------------------------|
| Hsu et al./National Chiao Tung University, Taiwan[50] | Electroforming                                       | V-groove patterns<br>Width:50μm<br>Height: 25 μm | FCD1<br>$T_g$ : 455°C<br><br>SF2<br>$T_g$ : 430°C | Boron nitride                   | Temperature: 490°C<br>Pressure: 15 MPa<br><br>Temperature: 485°C<br>Pressure: 15 MPa | Isothermal molding | N/A                                      | Optical communication         |
| Yi et al./Ohio State University, USA [55]             | Fast servo-assisted ultraprecision diamond machining | Aspherical lens                                  | K-PG325<br>$T_g$ : 285°C                          | N/A                             | Temperature: 325°C<br>Pressure: 3.18 MPa                                             | Isothermal molding | 14.39 nm                                 | Imaging applications          |
| Chen et al./Polytechnic of Turin, Italy [56]          | Laser micromachining                                 | Microchannel<br>Width: 500 μm                    | Soda-lime glass<br>$T_g$ : 580°C                  | NA                              | Temperature: 680°C<br>Pressure: 2.4 kPa                                              | Isothermal molding | 4 μm                                     | Microfluidic applications     |

|                                                         |                              |                                                                                                                                                                                                                         |                                                                                            |     |                                                                                                     |                    |     |                     |
|---------------------------------------------------------|------------------------------|-------------------------------------------------------------------------------------------------------------------------------------------------------------------------------------------------------------------------|--------------------------------------------------------------------------------------------|-----|-----------------------------------------------------------------------------------------------------|--------------------|-----|---------------------|
|                                                         |                              | Height: 160 $\mu\text{m}$                                                                                                                                                                                               |                                                                                            |     |                                                                                                     |                    |     |                     |
| Mekaru et al./National Institute of AIST, Japan [57]    | FIB milling                  | <p>MLA with a sag height of 4.5 <math>\mu\text{m}</math> and a radius of 12 <math>\mu\text{m}</math> and 20 <math>\mu\text{m}</math></p> <p>AIST logo with a character width of 10 <math>\mu\text{m}</math> or less</p> | <p>Pyrex glass</p> <p><math>T_g</math>: 560°C</p>                                          | N/A | <p>Temperature: 640°C</p> <p>Pressure: 2.5 MPa</p>                                                  | Isothermal molding | N/A | Light manipulation  |
| Zhou et al./Beijing Institute of Technology, China [58] | Single-point diamond turning | <p>Microgroove pattern</p> <p>Period: 10 <math>\mu\text{m}</math></p> <p>Height: 5 <math>\mu\text{m}</math></p>                                                                                                         | <p>KPG-325</p> <p><math>T_g</math>: 288°C</p> <p>PG-375</p> <p><math>T_g</math>: 344°C</p> | N/A | <p>Temperature: 330°C</p> <p>Pressure: 10 MPa</p> <p>Temperature: 380°C</p> <p>Pressure: 10 MPa</p> | Isothermal molding | N/A | Electronic displays |

|                                                                |                                     |                                                                                                                                                                                  |                                            |            |                                                                                          |                    |                |                            |
|----------------------------------------------------------------|-------------------------------------|----------------------------------------------------------------------------------------------------------------------------------------------------------------------------------|--------------------------------------------|------------|------------------------------------------------------------------------------------------|--------------------|----------------|----------------------------|
| Yasui et al./Kanagawa Industrial Technology Center, Japan [60] | Electroforming and photolithography | Micrograting patterns<br>Period: 40 $\mu\text{m}$<br>Mean depth: 4.15 $\mu\text{m}$                                                                                              | Borosilicate glass (D263)<br>$T_g$ : 557°C | No coating | Temperature: 610°C<br>Pressure: 0.89 MPa                                                 | Isothermal molding | NA             | Micro-optical applications |
| Yasui et al./Kanagawa Industrial Technology Center, Japan [61] | FIB milling                         | Line and space pattern<br>Width: 400 nm to 800 nm<br>Length: 15 $\mu\text{m}$<br><br>Square pit<br>Size: 20 $\mu\text{m}$ $\times$ 20 $\mu\text{m}$<br>Height: 6.5 $\mu\text{m}$ | Borosilicate glass (D263)<br>$T_g$ : 557°C | No coating | Temperature: 650°C<br>Pressure: 6.37 MPa<br><br>Temperature: 590°C<br>Pressure: 0.66 MPa | Isothermal molding | 20 nm to 40 nm | Microfluidic applications  |
| Mekaru et al./National Institute of AIST, Japan [62]           | FIB milling                         | MLA<br>Height: 4.5 $\mu\text{m}$<br>Radius: 12 $\mu\text{m}$ and 20 $\mu\text{m}$                                                                                                | Pyrex glass<br>$T_g$ : 560°C               | N/A        | Temperature: 620°C<br>Pressure: 2.5 MPa                                                  | Isothermal molding | N/A            | Optical applications       |

|                                                                                                   |                      |                                                                                                                         |                                                                                                                     |     |                                                                                                                                           |                                  |                 |                           |
|---------------------------------------------------------------------------------------------------|----------------------|-------------------------------------------------------------------------------------------------------------------------|---------------------------------------------------------------------------------------------------------------------|-----|-------------------------------------------------------------------------------------------------------------------------------------------|----------------------------------|-----------------|---------------------------|
| Chen et al./Polytechnic of Turin, Italy [63]                                                      | Laser micromachining | Microchannel<br>Width: 500 $\mu\text{m}$<br>Height: 160 $\mu\text{m}$                                                   | Soda lime glass,<br>$T_g$ : 580°C<br><br>Pyrex glass<br>$T_g$ : 640°C<br><br>Magneto-optical glass<br>$T_g$ : 360°C | N/A | Temperature: 660°C<br>Pressure: 2.407 kPa<br><br>Temperature: 710°C<br>Pressure: 2.1 kPa<br><br>Temperature: 410°C<br>Pressure: 1.929 kPa | Furnace heating-assisted molding | 4 $\mu\text{m}$ | Microfluidic applications |
| Mekaru et al./National Institute of Advanced Industrial Science and Technology (AIST), Japan [64] | FIB milling          | Line and space patterns with linewidths of 500 nm, 750 nm, and 1000 nm and a depth of 3 $\mu\text{m}$<br><br>Dot arrays | Pyrex glass<br>$T_g$ : 560°C                                                                                        | N/A | Temperature: 600°C<br>Pressure: 63.69 kPa                                                                                                 | Isothermal molding               | N/A             | Microfluidic applications |



|                                                                        |                                       |                                                                                                             |                                      |                     |                                              |                    |       |                         |
|------------------------------------------------------------------------|---------------------------------------|-------------------------------------------------------------------------------------------------------------|--------------------------------------|---------------------|----------------------------------------------|--------------------|-------|-------------------------|
| Zhou et al./Tohoku University, Japan [65]                              | Single-point diamond turning          | V-groove patterns<br><br>Width: 10 $\mu\text{m}$<br><br>Height: 5 $\mu\text{m}$                             | L-BAL42<br><br>$T_g$ : 506°C         | N/A                 | Temperature: 570°C<br><br>Pressure: 2.72 MPa | Isothermal molding | 2 nm  | Biomedical applications |
| Katsuki et al./Advanced Optical Manufacturing Technologies, Japan [66] | Diamond turning                       | MLA<br><br>Sag height: 6.56 $\mu\text{m}$<br><br>Aperture: 39.78 $\mu\text{m}$                              | PG-375<br><br>$T_g$ : 344°C          | N/A                 | Temperature: 375°C<br><br>Pressure: 7 MPa    | Isothermal molding | N/A   | Mobile phone cameras    |
| Kim et al./Yonsei University, Korea, Republic of [67]                  | Electroforming                        | MLA<br><br>Diameter: 80 $\mu\text{m}$<br><br>Pitch: 100 $\mu\text{m}$<br><br>Sag height: 15.2 $\mu\text{m}$ | K-PSFn214<br><br>$T_g$ : 425°C       | DLC coating: 500 nm | Temperature: 790°C<br><br>Pressure: 1 MPa    | Active heating     | 1 nm  | Optical imaging         |
| Chen et al./Politecnico di Torino, Italy [68]                          | Laser machining followed by polishing | Microchannel<br><br>Dimensions: 140 $\mu\text{m}$ × 150 $\mu\text{m}$                                       | Soda-lime glass<br><br>$T_g$ : 564°C | N/A                 | Temperature: 640°C<br><br>Pressure: 7 kPa    | Isothermal molding | 40 nm | DNA analysis            |

**Table S3:** Summary of studies on micro/nano glass molding with SiC molds. Acronyms: UV: ultraviolet; Si: silicon; EBL: electron-beam lithography; RIE: reactive ion etching; CBG: carbon-bonded graphene; C-film: carbon film; GC: glassy carbon; DLC: diamond-like carbon; N/A: not available.

| Authors & Affiliations                    | Mold fabrication methods                            | Pattern geometries on the glass                                                                                                    | Glass materials           | Anti-adhesion coating materials    | Molding conditions                       | Molding methods    | Mold surface roughness (Ra) | Proposed/ tested applications |
|-------------------------------------------|-----------------------------------------------------|------------------------------------------------------------------------------------------------------------------------------------|---------------------------|------------------------------------|------------------------------------------|--------------------|-----------------------------|-------------------------------|
| Minet al./Tohoku University [70]          | Replication from Si master mold                     | Non-spherical lens<br>Diameter: 300 $\mu\text{m}$<br>Height: 14 $\mu\text{m}$<br><br>Trench and pits:<br>Width: 5–20 $\mu\text{m}$ | K-PG395<br>$T_g$ : 363°C  | DLC coating<br>Thickness: 1000 nm  | Temperature: 400°C<br>Pressure: 2.45 MPa | Isothermal molding | 1.2 nm                      | Optical communication         |
| Shin et al./Tohoku University [71]        | Replication from Si master mold                     | Nanograting patterns<br>Width: 300 nm<br>Pitch: 600 nm                                                                             | Pyrex<br>$T_g$ : 560°C    | No coating layer                   | Temperature: 800°C<br>Pressure: 1 MPa    | Isothermal molding | N/A                         | Optical applications          |
| Itoh et al./Tohoku University, Japan [72] | Replication by reaction bonding from Si master mold | Triangular structures<br>Pitch: 5–20 $\mu\text{m}$                                                                                 | Pyrex<br>$T_g$ : 560°C    | GC coating                         | Temperature: 850°C<br>Pressure: 1 MPa    | Isothermal molding | 8 nm                        | Optical fiber networks        |
| Tamura et al./Hokkaido University [74]    | EBL and RIE                                         | Antireflection structures<br>Pitch: 250 nm                                                                                         | K-PSK100<br>$T_g$ : 390°C | C-film coating<br>Thickness: 50 nm | Temperature: 420°C<br>Pressure: 5 MPa    | Isothermal molding | N/A                         | Antireflection                |

|                                                                          |                             |                                                                                    |                                  |                                    |                                                |                    |        |                            |
|--------------------------------------------------------------------------|-----------------------------|------------------------------------------------------------------------------------|----------------------------------|------------------------------------|------------------------------------------------|--------------------|--------|----------------------------|
| Huang et al./National Chiao Tung University, Taiwan [75]                 | UV laser micromachining     | Microchannel<br>Width: 200 $\mu\text{m}$<br>Depth: 185 $\mu\text{m}$               | Soda-lime glass<br>$T_g$ : 573°C | CBG coating<br>Thickness: 45 nm    | Temperature: 620°C<br>Pressure: 50 kPa         | Isothermal molding | 700 nm | Bioanalysis                |
| Yamada et al./National Institute of AIST[76]                             | EBL and plasma-assisted RIE | Antireflection structures<br>Depth: 250 nm and 290 nm<br>Pitch: 300 nm             | K-PSK100<br>$T_g$ : 390°C        | C-film coating<br>Thickness: 50 nm | Temperature: 430°C<br>Pressure: 5 MPa          | Isothermal molding | N/A    | Antireflection             |
| Huang et al./National Applied Research Laboratories, Hsinchu, Taiwan[77] | UV laser micromachining     | MLA<br>Diameter: 20 mm<br>Sag height: 52 $\mu\text{m}$<br>Pitch: 700 $\mu\text{m}$ | Soda-lime glass<br>$T_g$ : 573°C | N/A                                | Temperature: 630°C<br>Pressure: 6.6 to 9.1 MPa | Isothermal molding | N/A    | Uniform light illumination |

**Table S4:** Examples of studies on micro/nano glass molding with WC molds. Acronyms: MLA: microlens array; DLC: diamond-like carbon; Pt: platinum; Pt-Ir: platinum-iridium; Re-Ir: rhenium-iridium; N/A: not available.

| Authors & Affiliations                                                     | Mold fabrication methods   | Pattern geometries on the glass    | Glass materials           | Anti-adhesion coating materials | Molding conditions                       | Molding methods    | Mold surface roughness (Ra) | Proposed/ tested applications |
|----------------------------------------------------------------------------|----------------------------|------------------------------------|---------------------------|---------------------------------|------------------------------------------|--------------------|-----------------------------|-------------------------------|
| Cha et al./Korea Photonics Technology Institute, Korea [22]                | Grinding and polishing     | Aspherical lens                    | L-BSL7<br>$T_g$ : 498°C   | DLC coating<br>Thickness: 80 nm | Temperature: 555°C<br>Pressure: 50 kPa   | Isothermal molding | 4.018 nm                    | Mobile phone cameras          |
| Dambon et al./Fraunhofer Institute for Production Technology, Germany [80] | Ultraprecision grinding    | Aspherical lens<br>Diameter: 22 mm | P-SK 57<br>$T_g$ : 493°C  | N/A                             | Temperature: 545°C<br>Pressure: 7.9 MPa  | Isothermal molding | less than 5 nm              | Optical imaging               |
| Huang et al./Hsinchu Science Park, Taiwan [81]                             | Precision diamond grinding | Fresnel lens                       | K-CSK120<br>$T_g$ : 489°C | Pt-Ir alloy coated              | Temperature: 560°C<br>Pressure: 1.67 MPa | Isothermal molding | N/A                         | CPV applications              |

|                                                             |                                             |                                                                   |                                                                                                    |                                    |                                             |                    |                 |                            |
|-------------------------------------------------------------|---------------------------------------------|-------------------------------------------------------------------|----------------------------------------------------------------------------------------------------|------------------------------------|---------------------------------------------|--------------------|-----------------|----------------------------|
| Aono et al./Nikon Corporation, Japan[82]                    | Precision grinding and polishing            | Aspherical lens<br>Diameter: 60.5 mm                              | SK5<br>$T_g$ : 667°C                                                                               | N/A                                | Temperature: 720–730°C<br>Pressure: 0.63MPa | Isothermal molding | 10 nm           | Optical imaging            |
| Han et al./Yonsei University, Korea [83]                    | Replication by sintering from a master mold | MLA<br>Sag height: 3.6 $\mu\text{m}$<br>Period: 190 $\mu\text{m}$ | K-PSK100<br>$T_g$ : 390°C                                                                          | Pt coating                         | Temperature: 415°C<br>Pressure: 1.27 kPa    | Isothermal molding | less than 53 nm | Laser beam focusing        |
| Chen et al./Hsinchu Science Park, Taiwan[84]                | Ultraprecision diamond grinding             | MLA<br>Sag height: 8.5 $\mu\text{m}$                              | K-CSK120<br>$T_g$ : 498°C                                                                          | N/A                                | Temperature: 550–570°C<br>Pressure: 15 kPa  | Isothermal molding | 10 nm           | Light intensity modulation |
| Kim et al./Korea Photonics Technology Institute, Korea [85] | Ultraprecision grinding and polishing       | Aspherical lens                                                   | Chalcogenide glass<br>NBU-IR1<br>( $\text{Ge}_{20}\text{Sb}_{15}\text{Se}_{65}$ )<br>$T_g$ : 285°C | DLC coating<br>Thickness: 100 nm   | Temperature: 320°C<br>Direct pressure       | Isothermal molding | 17.5 nm         | Cameras for night vision   |
| Kim et al./Korea Photonics Technology Institute, Korea [86] | Ultraprecision grinding and polishing       | Aspherical lens                                                   | Chalcogenide glass<br>(IG4)<br>$T_g$ : 225°C                                                       | Re-Ir coating<br>Thickness: 250 nm | Temperature: 320°C<br>Pressure: 1.18 MPa    | Isothermal molding | 9 nm            | IR imaging applications    |
| Wang et                                                     | Precision                                   | Aspherical lens                                                   | B270                                                                                               | N/A                                | Temperature: 635°C                          | Isothermal         | 2 nm            | Light                      |

|                                                                               |                        |                      |                            |                                      |                                       |                    |                                     |                                  |
|-------------------------------------------------------------------------------|------------------------|----------------------|----------------------------|--------------------------------------|---------------------------------------|--------------------|-------------------------------------|----------------------------------|
| al./Ohio State University [87]                                                | grinding               |                      | $T_g$ : 533°C              |                                      | Pressure: 1.58 MPa                    | molding            |                                     | manipulation for optical systems |
| Bernhardt et al./Fraunhofer Institute for Production Technology, Germany [88] | Grinding and polishing | Lens array           | P-LASF47<br>$T_g$ : 493 °C | ta-C DLC coated<br>Thickness: 300 nm | Temperature: 590°C<br>Pressure: 3 kPa | Isothermal molding | 5 nm                                | Optical applications             |
| Allen et al./Ohio State University [89]                                       | Grinding and polishing | Aspherical lens      | BK7<br>$T_g$ : 557 °C      | Pt coating<br>Thickness: 500 nm      | Temperature: 684°C<br>Pressure: 4 MPa | Isothermal molding | 2 nm                                | Optical applications             |
| Allen et al./Ohio State University [90]                                       | Grinding and polishing | Aspherical lens      | BK7<br>$T_g$ : 557°C       | Pt coating<br>Thickness: 500 nm      | Temperature: 700°C<br>Pressure: 4 MPa | Isothermal molding | 2 nm                                | Optical applications             |
| K. Jiang et al./College of Mechatronic                                        | Wire-cur EDM           | Microfluidic channel | BK7<br>$T_g$ : 560°C       | Nitride coating                      | Temperature: 660°C<br>Pressure: 4 MPa | Hot embossing      | Surface roughness ( $S_a$ ): 1.1 nm | Microfluidic application         |

|                                                                                          |           |                                                                        |                       |                                           |                                        |                  |                              |                        |
|------------------------------------------------------------------------------------------|-----------|------------------------------------------------------------------------|-----------------------|-------------------------------------------|----------------------------------------|------------------|------------------------------|------------------------|
| s and<br>Control<br>Engineering/<br>China [91]                                           |           |                                                                        |                       |                                           |                                        |                  |                              |                        |
| K. Liet<br>al./Universit<br>y of Science<br>and<br>Technology<br>Liaoning/<br>China [92] | Micro-EDM | Microholes<br>Diameter: 320 $\mu\text{m}$<br>Period: 320 $\mu\text{m}$ | D-K9<br>$T_g$ : 496°C | Nitride<br>coating<br>Thickness: 12<br>nm | Temperature: 540°C<br>Pressure: 12 MPa | Hot<br>embossing | Surface<br>roughness:<br>N/A | Optical<br>application |

**Table S5:** Summary of studies of GC micro/nano mold insert systems for glass imprinting. Acronyms: MLA: microlens array; RMS: root mean square; MEMS: microelectromechanical system; ICP: inductively coupled plasma; RIE: reactive ion etching; FIB: focused ion beam; N/A: not available.

| Authors & Affiliations                                              | Mold fabrication methods             | Pattern geometries on mold                                                                                        | Glass materials                                                    | Anti-adhesion coating materials | Molding conditions                                                                        | Molding methods    | Mold surface roughness                       | Proposed/ tested applications |
|---------------------------------------------------------------------|--------------------------------------|-------------------------------------------------------------------------------------------------------------------|--------------------------------------------------------------------|---------------------------------|-------------------------------------------------------------------------------------------|--------------------|----------------------------------------------|-------------------------------|
| Tseng et al./National Changhua University of Education, Taiwan [23] | Laser micromachining                 | Microchannel<br>Width: 120 $\mu\text{m}$<br>Depth: 180.26 $\mu\text{m}$<br>Length: 10 mm                          | Soda-lime glass<br>$T_g$ : 564°C                                   | N/A                             | Temperature: 660°C<br>Pressure: 0.22 kPa                                                  | Isothermal molding | Surface roughness ( $R_a$ ): 672 $\pm$ 80 nm | Microfluidic applications     |
| Youn et al./National Institute of AIST, Japan [105]                 | Laser machining and FIB milling      | Various microstructures                                                                                           | Pyrex glass<br>$T_g$ : 560°C<br><br>Quartz glass<br>$T_g$ : 1200°C | N/A                             | Temperature: 645°C<br>Pressure: 2.83 kPa<br><br>Temperature: 1305°C<br>Pressure: 0.22 kPa | Isothermal molding | Surface roughness ( $R_a$ ): 80 nm           | Optical applications          |
| Sasaki et al./Advanced Manufacturing Research Institute             | Dicing/sawing<br><br>Laser machining | Square blocks<br>Size: 100 $\mu\text{m}$ $\times$ 100 $\mu\text{m}$ $\times$ 50 $\mu\text{m}$<br><br>Microchannel | Borofloat glass<br>$T_g$ : 525°C                                   | N/A                             | Temperature: 655°C<br>Pressure: 2 MPa<br><br>Temperature: 655°C<br>Pressure: 13 MPa       | Isothermal molding | Surface roughness ( $R_a$ ): 300 nm          | Bio-MEMS applications         |



|                                                          |               |                                                                                                                                                                                                                                                       |                                                                    |     |                                                                                                                                     |                    |                                       |                      |
|----------------------------------------------------------|---------------|-------------------------------------------------------------------------------------------------------------------------------------------------------------------------------------------------------------------------------------------------------|--------------------------------------------------------------------|-----|-------------------------------------------------------------------------------------------------------------------------------------|--------------------|---------------------------------------|----------------------|
| (AIST),<br>Japan [106]                                   |               |                                                                                                                                                                                                                                                       |                                                                    |     |                                                                                                                                     |                    |                                       |                      |
| Takahashi et al./National Institute of AIST, Japan [107] | Dicing/sawing | Various microstructures<br>Height and width<br>100 $\mu\text{m}$ , 100 $\mu\text{m}$ ,<br>50 $\mu\text{m}$ , 50 $\mu\text{m}$ , 50 $\mu\text{m}$ , 100 $\mu\text{m}$<br>respectively                                                                  | Pyrex glass<br>$T_g$ : 560°C                                       | NA  | Temperature: 645°C<br>Pressure: 2.83 MPa                                                                                            | Isothermal molding | Surface roughness ( $R_a$ ): 150 nm   | Optical applications |
| Ito et al./Shinshu University, Japan [108]               | Dicing/sawing | Line and space pattern<br>Width: 10 $\mu\text{m}$ ,<br>Period: 20 $\mu\text{m}$<br>Height: 11.5 $\mu\text{m}$                                                                                                                                         | Pyrex<br>$T_g$ : 560°C<br><br>D263<br>$T_g$ : 557°C                | N/A | Temperature: 670°C<br>Pressure: 3.56 MPa<br><br>Temperature: 620°C<br>Pressure: 3.56 MPa                                            | Isothermal molding | Surface roughness:<br>optical quality | Optical applications |
| Takahashi et al./University of Shinshu [109]             | FIB milling   | Various microstructures<br>10×10×2 $\mu\text{m}^3$<br>10×10×3 $\mu\text{m}^3$<br>10×10×7 $\mu\text{m}^3$<br>Micro pyramid:<br>Width: 20 $\mu\text{m}$<br>Height: 15 $\mu\text{m}$<br>Line-and-space pattern:<br>Depth: from 1 $\mu\text{m}$ to 300 nm | Pyrex glass<br>$T_g$ : 460°C<br><br>Quartz glass<br>$T_g$ : 1200°C | NA  | Temperature: 590°C, 595°C, and 590°C<br>Pressure: 0.22 MPa, 0.45 MPa, and 0.22 MPa<br><br>Temperature: 1385°C<br>Pressure: 0.43 MPa | Isothermal molding | Surface roughness ( $R_a$ ): 20 nm    | MEMS applications    |

|                                                                                                  |                          |                                                                                                                                  |                              |     |                                                                                           |                                          |                                       |                              |
|--------------------------------------------------------------------------------------------------|--------------------------|----------------------------------------------------------------------------------------------------------------------------------|------------------------------|-----|-------------------------------------------------------------------------------------------|------------------------------------------|---------------------------------------|------------------------------|
| Takagi et al./Advanced Manufacturing Research Institute, National Institute of AIST, Japan [110] | FIB milling              | Line-and-space pattern<br>Width: 5 $\mu\text{m}$ , 1 $\mu\text{m}$ , 0.5 $\mu\text{m}$ , and 0.3 $\mu\text{m}$<br>Height: 150 nm | B207<br>$T_g$ : 521°C        | N/A | Temperature: 440°C<br>Pressure: 0.01 MPa<br><br>Temperature: 550°C<br>Pressure: 1 MPa     | Active heating<br><br>Isothermal molding | NA                                    | MEMS applications            |
| Youn et al. /National Institute of AIST, Japan [111]                                             | FIB milling              | Square pattern<br>20 $\mu\text{m} \times 20 \mu\text{m}$<br><br>Fluidic channel                                                  | Pyrex Glass<br>$T_g$ : 560°C | N/A | Temperature: 645°C<br>Pressure: 2.83 MPa<br><br>Temperature: 1300°C<br>Pressure: 0.26 MPa | Isothermal molding                       | Surface roughness ( $R_a$ ): 5 nm     | MEMS applications            |
| Chen et al./Ohio State University, USA [112]                                                     | Photolithography and RIE | Microholes<br>Diameter: 100 $\mu\text{m}$<br>Depth: 10 $\mu\text{m}$<br>Pitch: 200 $\mu\text{m}$                                 | P-SK57<br>$T_g$ : 493°C      | N/A | Temperature: 565°C<br>Pressure: 1 MPa                                                     | Isothermal molding                       | NA                                    | Optical intensity modulation |
| Yasui et al./Kanagawa Industrial Technology Center,                                              | EBL and RIE              | Line and space patterns<br>Width: 500 nm<br>Height: 300 nm                                                                       | Pyrex glass<br>$T_g$ : 560°C | NA  | Temperature: 630°C<br>Pressure: 0.31 MPa                                                  | Isothermal Molding                       | Surface roughness ( $R_a$ ): 7.792 nm | Optical applications         |

|                                                       |                                                                     |                                                                                                                                                                                                                                                                                                     |                                                                                                 |     |                                                                                                 |                    |                                        |                      |
|-------------------------------------------------------|---------------------------------------------------------------------|-----------------------------------------------------------------------------------------------------------------------------------------------------------------------------------------------------------------------------------------------------------------------------------------------------|-------------------------------------------------------------------------------------------------|-----|-------------------------------------------------------------------------------------------------|--------------------|----------------------------------------|----------------------|
| Japan [113]                                           |                                                                     |                                                                                                                                                                                                                                                                                                     |                                                                                                 |     |                                                                                                 |                    |                                        |                      |
| Mekaru et al./National Institute of AIST, Japan [114] | Photolithography and RIE                                            | <p>Circular/square pattern:<br/>Diameter/width: 5 <math>\mu\text{m}</math><br/>Depth: 2.1 <math>\mu\text{m}</math><br/>Vertical sidewall: 2.38</p> <p>Circular/square pattern:<br/>Diameter/width: 5 <math>\mu\text{m}</math><br/>Depth: 0.8 <math>\mu\text{m}</math><br/>Curved sidewall: 6.25</p> | <p>Pyrex glass<br/><math>T_g</math>: 560°C</p> <p>Quartz glass<br/><math>T_g</math>: 1150°C</p> | NA  | <p>Temperature: 645°C<br/>Pressure: 3.11 MPa</p> <p>Temperature: 1320°C<br/>Pressure: 2 MPa</p> | Isothermal molding | Surface roughness ( $R_a$ ): 1–3 nm    | MEMS applications    |
| Ju et al./Chung-Ang University, Korea [116]           | Carbonization of patterned polymer replicated from a Si master mold | <p>Micrograting pattern<br/>Pitch: 46.3 <math>\mu\text{m}</math>,<br/>Height: 3.81 <math>\mu\text{m}</math></p>                                                                                                                                                                                     | <p>K-PG375<br/><math>T_g</math>: 344°C</p>                                                      | N/A | <p>Temperature: 380°C<br/>Pressure: 3 MPa</p>                                                   | Isothermal molding | RMS roughness ( $R_z$ ): 3.7 nm        | Optical applications |
| Kim et al./Chung-Ang University, Korea [117]          | Carbonization of patterned polymer replicated from a Ni master mold | <p>Fresnel lens<br/>40×40 mm<sup>2</sup></p>                                                                                                                                                                                                                                                        | <p>Soda-lime glass<br/><math>T_g</math>: 564°C</p>                                              | NA  | <p>Temperature: 720°C<br/>Pressure: 140 kPa</p>                                                 | Isothermal molding | Average roughness ( $R_a$ ): 16 ± 2 nm | CPV                  |

|                                                                             |                              |                                                                                                                                                   |                          |     |                                                                                      |                    |                                     |                      |
|-----------------------------------------------------------------------------|------------------------------|---------------------------------------------------------------------------------------------------------------------------------------------------|--------------------------|-----|--------------------------------------------------------------------------------------|--------------------|-------------------------------------|----------------------|
| Ito et al./Shinshu University, Japan [119]                                  | FIB milling                  | Line and space pattern<br>Width: 723 nm<br>Height: 734 nm<br><br>MLA<br>Sag height: 0.84 $\mu\text{m}$                                            | D263<br>$T_g$ : 557°C    | N/A | Temperature: 670°C<br>Pressure: 7.3 MPa<br><br>Temperature: 620°C<br>Pressure: 4 MPa | Isothermal molding | NA                                  | Optical applications |
| Mori et al. /National Institute of AIST, Japan [120]                        | EBL and plasma-based RIE     | Pattern structure 1:<br>Period 500 nm and height 730 nm<br>Width: 150, 220, 290, and 330 nm<br>Pattern structure 2:<br>Pitch 500 nm and depth 350 | U-SK55M<br>$T_g$ : 430°C | N/A | Temperature: 500°C<br>Pressure: 17.78 kPa                                            | Isothermal molding | NA                                  | Optical polarization |
| Prater et al./École Polytechnique Fédérale de Lausanne (EPFL), Switzerland[ | Photolithography and ICP RIE | DOE<br>Height: 690 nm<br>Critical dimension: 2 $\mu\text{m}$                                                                                      | L-BAL42<br>$T_g$ : 506°C | N/A | Temperature: 550°C<br>Pressure: 80 kPa                                               | Isothermal molding | Surface roughness ( $R_a$ ): 2.5 nm | Beam splitting       |

|                                                     |                                |                                                                                                |                                                                           |     |                                                                                           |                    |                                     |                                       |
|-----------------------------------------------------|--------------------------------|------------------------------------------------------------------------------------------------|---------------------------------------------------------------------------|-----|-------------------------------------------------------------------------------------------|--------------------|-------------------------------------|---------------------------------------|
| 121]                                                |                                |                                                                                                |                                                                           |     |                                                                                           |                    |                                     |                                       |
| Chenet al./Ohio State University, USA [122]         | Micromachining and dry etching | DOE<br>Height: 150 nm<br>Width: 3 $\mu\text{m}$                                                | B207<br>$T_g$ : 533°C                                                     | N/A | Temperature: 690°C<br>Pressure: 400 kPa                                                   | Isothermal molding | Surface roughness ( $R_a$ ): 40 nm  | Laser light intensity modulation      |
| Prateret al./EPFL, Switzerland [123]                | Photolithography and RIE       | DOE pattern<br><br>Square pattern: 20 $\mu\text{m}$ ×20 $\mu\text{m}$<br>Height: 600 nm        | L-BAL42<br>$T_g$ : 506°C<br><br>Fused Silica<br>$T_g$ : 1200°C            | N/A | Temperature: 550°C<br>Pressure: 4.15 MPa<br><br>Temperature: 1360°C<br>Pressure: 4.15 MPa | Isothermal molding | Surface roughness ( $R_a$ ): 3 nm   | DOE                                   |
| Ikeda et al./Hokkaido University, Japan [124]       |                                | Square pit<br>10mm×10mm×1mm                                                                    | K-PSK200<br>$T_g$ : 387°C<br><br>L-BAL42<br>$T_g$ : 504°C                 | N/A | Temperature: 420°C<br>Pressure: 2 MPa<br><br>Temperature: 560°C<br>Pressure: 2 MPa        | Isothermal molding | Surface roughness ( $R_a$ ): 1.3 nm | Optical imaging                       |
| Youn et al./National Institute of AIST, Japan [125] | EBL and RIE                    | Microfluidic channel<br><br>Line and space pattern<br>Period: 1 $\mu\text{m}$<br>Depth: 900 nm | Quartz glass<br>$T_g$ : 1200°C<br><br>Borosilicate glass<br>$T_g$ : 557°C | N/A | Temperature: 1300°C<br>Pressure: 3.05 MPa<br><br>Temperature: 650°C<br>Pressure: 1.33 MPa | Isothermal molding | Surface roughness ( $R_a$ ): 2 nm   | Optical and microfluidic applications |
| Haq et                                              | Carbonization of               | Microchannel                                                                                   | Soda-lime                                                                 | NA  | Temperature: 720°C                                                                        | Isothermal         | 12 $\pm$ 1 nm                       | Microfluidic                          |

|                                              |                                                                     |                                                                                                                                                                                                                         |                                  |     |                                           |                    |                                                 |                              |
|----------------------------------------------|---------------------------------------------------------------------|-------------------------------------------------------------------------------------------------------------------------------------------------------------------------------------------------------------------------|----------------------------------|-----|-------------------------------------------|--------------------|-------------------------------------------------|------------------------------|
| al./Chung-Ang University, Korea [126]        | patterned polymer replicated from a Si master mold                  | Pitch: 396.7 $\mu\text{m}$<br>Height: 33.3 $\mu\text{m}$                                                                                                                                                                | glass<br>$T_g$ : 564°C           |     | Pressure: 10 kPa                          | molding            |                                                 | applications                 |
| Kim et al./Chung-Ang University, Korea[127]  | Carbonization of patterned polymer replicated from a Si master mold | MLA<br>Pitch: 9.9 $\mu\text{m}$ ,<br>Sag height: 0.704 $\mu\text{m}$                                                                                                                                                    | Soda-lime glass<br>$T_g$ : 564°C | NA  | Temperature: 720°C<br>Pressure: 2 kPa     | Isothermal molding | RMS roughness ( $R_z$ ): 4.78 nm                | Optical intensity modulation |
| Janget al./Chung-Ang University, Korea [128] | Carbonization of patterned polymer replicated from a Si master mold | Microfluidic channel<br>Orifice: 43.5 $\mu\text{m}$<br>Width: 88.93 $\mu\text{m}$<br>Height: 28.07 $\mu\text{m}$                                                                                                        | Soda-lime glass<br>$T_g$ : 564°C | NA  | Temperature: 680°C<br>Pressure: 163.2 kPa | Isothermal molding | Average roughness ( $R_a$ ): 2.83 $\pm$ 0.41 nm | Microfluidic applications    |
| Janget al./Chung-Ang University, Korea [129] | Carbonization of patterned polymer replicated from a Si master mold | Microchannel<br>Width and height of inlet, outlet and extraction channels are 153.6 $\mu\text{m}$ , 51.6 $\mu\text{m}$ , 462.7 $\mu\text{m}$ , 53.7 $\mu\text{m}$ , 151 $\mu\text{m}$ 53.4 $\mu\text{m}$ , respectively | Soda-lime glass<br>$T_g$ : 564°C | NA  | Temperature: 700°C<br>Pressure: 18 kPa    | Isothermal molding | RMS roughness ( $R_z$ ): 12 nm                  | Microfluidic applications    |
| Haq et al./ Chung-Ang                        | Carbonization of patterned                                          | Nanopin array<br>Period: 325 $\mu\text{m}$ ,                                                                                                                                                                            | Soda-lime Glass                  | N/A | Temperature: 700°C<br>Pressure: 1 MPa     | Isothermal molding | N/A                                             | Antireflection               |

|                            |                                                |                                                         |               |  |  |  |  |  |
|----------------------------|------------------------------------------------|---------------------------------------------------------|---------------|--|--|--|--|--|
| University,<br>Korea [130] | polymer<br>replicated from a<br>Si master mold | Diameter: 110 $\mu\text{m}$<br>Depth: 220 $\mu\text{m}$ | $T_g$ : 564°C |  |  |  |  |  |
|----------------------------|------------------------------------------------|---------------------------------------------------------|---------------|--|--|--|--|--|

**Table S6:** Summary of studies on other micro/nano mold insert systems for glass imprinting. Acronyms: MLA: microlens array; KrF: krypton fluoride; RIE: reactive ion etching; FIB: focused ion beam; CBG: carbon-bonded graphene; DLC: diamond-like carbon; Si<sub>3</sub>N<sub>4</sub>: silicon nitride; DOE: diffractive optical element, AAO: Anodic aluminum oxide.

| Authors & Affiliations                                               | Mold fabrication methods                                             | Pattern geometries on the glass                                          | Glass materials                                                                       | Anti-adhesion coating materials | Molding conditions                      | Molding methods    | Mold surface roughness (R <sub>a</sub> ) | Proposed/tested applications |
|----------------------------------------------------------------------|----------------------------------------------------------------------|--------------------------------------------------------------------------|---------------------------------------------------------------------------------------|---------------------------------|-----------------------------------------|--------------------|------------------------------------------|------------------------------|
| Zhu et al./Zhejiang University of Science and Technology, China[132] | CC<br><br>Ultraprecision diamond grinding                            | Aspherical lens<br>Concave<br>radius: 97.01 mm<br>Center thickness: 7 mm | Chalcogenide glass (NBU-IR1)<br><i>T<sub>g</sub></i> : 285°C                          | DLC coating                     | Temperature: 315°C<br>Pressure: 0.7 MPa | Isothermal molding | 80 nm                                    | IR imaging                   |
| Zhang et al./Ohio State University, USA [134]                        | Al alloy mold<br><br>Servo-assisted ultraprecision diamond machining | Sag height: 5.22 μm                                                      | Chalcogenide glass (As <sub>2</sub> Se <sub>3</sub> )<br><i>T<sub>g</sub></i> : 197°C | NA                              | Temperature: 215°C<br>Pressure: 2.7 MPa | Isothermal molding | 13.65 nm                                 | IR imaging applications      |



|                                                 |                                                                  |                                                                                                                                                                                                                               |                                                                                                                                                 |                                |                                                                                                                                 |                    |             |                         |
|-------------------------------------------------|------------------------------------------------------------------|-------------------------------------------------------------------------------------------------------------------------------------------------------------------------------------------------------------------------------|-------------------------------------------------------------------------------------------------------------------------------------------------|--------------------------------|---------------------------------------------------------------------------------------------------------------------------------|--------------------|-------------|-------------------------|
| L. Zhang et al./Ohio State University, USA[135] | Al alloy mold<br><br>Multi-axes ultraprecision diamond machining | Freeform MLA<br>Dimension:<br>2.5×2.5 mm <sup>2</sup>                                                                                                                                                                         | Chalcogenide glass<br>(As <sub>2</sub> Se <sub>3</sub> )                                                                                        | NA                             | Temperature: 225°C<br>Pressure: 8.86 kPa                                                                                        | Isothermal molding | 22.64 nm    | Infrared imaging        |
| Komori et al./Kyoto University, Japan [136]     | CVD diamond mold<br><br>FIB milling                              | Various microstructures<br><br>Line and space patterns:<br>8μm×50μm<br>Height: 0.17μm to 3.60μm.<br>5μm×50μm, 3μm×30μm<br>1μm×10μm<br>Height: 2μm and 1μm<br>Square pits<br>8μm×10μm and 1μm×10μm<br>Depth: 0.36μm and 0.31μm | Pyrex glass<br><i>T<sub>g</sub></i> : 560°C<br><br>BK7 glass<br><i>T<sub>g</sub></i> : 560°C<br><br>Tempaxglass<br><i>T<sub>g</sub></i> : 525°C | No coating                     | Temperature: 690°C<br>Pressure: 1 MPa<br><br>Temperature: 650°C<br>Pressure: 1 MPa<br><br>Temperature: 640°C<br>Pressure: 1 MPa | Isothermal molding | Very low    | Biomedical applications |
| Hirai et                                        | Si-based SiO <sub>2</sub>                                        | Nanograting                                                                                                                                                                                                                   | Low <i>T<sub>g</sub></i>                                                                                                                        | Si <sub>3</sub> N <sub>4</sub> | Temperature: 405°C                                                                                                              | Isothermal         | 0.251–0.288 | Optical                 |

|                                                            |                                                      |                                                                                                |                                                                                        |                                |                                                                                        |                                        |       |                        |
|------------------------------------------------------------|------------------------------------------------------|------------------------------------------------------------------------------------------------|----------------------------------------------------------------------------------------|--------------------------------|----------------------------------------------------------------------------------------|----------------------------------------|-------|------------------------|
| al./Osaka<br>Prefecture<br>University,<br>Japan [138]      | mold<br><br>KrF lithography<br>and RIE               | pattern<br>Width: 1.0 $\mu\text{m}$ ,<br>330 nm, and<br>250 nm<br>Depth: 300 nm                | glass<br>$T_g$ : 375°C                                                                 | coating<br>Thickness:<br>20 nm | Pressure: 45 MPa                                                                       | molding                                | nm    | applications           |
| Li et<br>al./Ohio<br>State<br>University,<br>USA [139]     | Fused silica mold<br><br>Photolithography<br>and RIE | Square pit<br>Size: 10 $\mu\text{m}$ $\times$<br>10 $\mu\text{m}$<br>Height: 0.8 $\mu\text{m}$ | Arsenic<br>trisulfide<br>glass<br>(As <sub>40</sub> S <sub>60</sub> )<br>$T_g$ : 180°C | CBG<br>coating                 | Temperature: 271°C<br>Pressure: 25 kPa<br><br>Temperature: 240°C<br>Pressure: 33.6 kPa | Active<br>and<br>isothermal<br>molding | 3 nm  | Camera<br>applications |
| Arai et<br>al./Shinshu<br>University,<br>Japan [140]       | CC                                                   | Spherical lens<br>Diameter: 7.2<br>mm                                                          | BK7<br>$T_g$ : 572°C                                                                   | NA                             | Temperature: 670°C<br>Pressure: 20 MPa                                                 | Isothermal<br>molding                  | 20 nm | Optical imaging        |
| X. Liu et al./<br>Shenzhen<br>University,<br>China[141]    | AAO                                                  | Nano porous<br>patterns<br>Diameter: 100<br>nm to 250 nm                                       | D-FK61<br>$T_g$ : 440°C                                                                | NA                             | Temperature: 470°C<br>Pressure: 12.7 MPa                                               | Isothermal<br>molding                  | NA    | Antireflection         |
| Feng Y. et<br>al/<br>Shenzhen<br>University,<br>China[142] | AAO                                                  | Nano porous<br>patterns<br>Diameter: 390<br>nm                                                 | D-FK61<br>$T_g$ : 440°C                                                                | NA                             | Temperature: 480°C<br>Pressure: 12.7 MPa                                               | Isothermal<br>molding                  | NA    | Antireflection         |

|                                                      |                                                          |                                             |                          |    |                                          |                       |       |                  |
|------------------------------------------------------|----------------------------------------------------------|---------------------------------------------|--------------------------|----|------------------------------------------|-----------------------|-------|------------------|
| Yiet<br>al./Ohio<br>State<br>University,<br>USA[143] | Fused silica mold<br>Photolithography<br>and RIE etching | Lateral: 10 $\mu\text{m}$<br>Height: 330 nm | K-PG325<br>$T_g$ : 285°C | NA | Temperature: 325°C<br>Pressure: 0.13 MPa | Isothermal<br>molding | 24 nm | DOE applications |
|------------------------------------------------------|----------------------------------------------------------|---------------------------------------------|--------------------------|----|------------------------------------------|-----------------------|-------|------------------|
